# Supplementary material for: Effect of Nicotinamide Mononucleotide Concentration in Human Milk on Neurodevelopmental Outcome: The Tohoku Medical Megabank Project Birth and Three-Generation Cohort Study
Source: MDPI journal article supplement (doi:10.3390/nu16010145), 2023-12-31
Supplement: s1 [file s1]

## Online Supplementary Material

Effect of nicotinamide mononucleotide concentration in human milk on neurodevelopmental outcome: the Tohoku Medical Megabank Project Birth and Three-Generation Cohort Study.

Yoshie Saito et al.

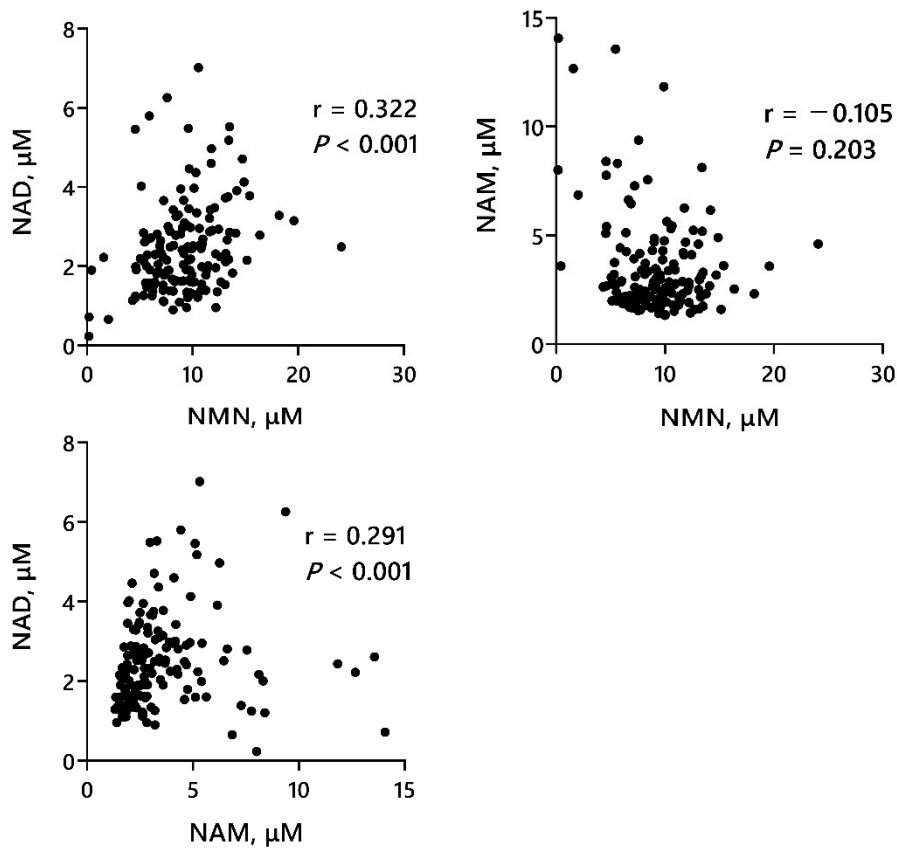

**Supplementary Figure S2.** Correlation of NAD-related compounds in human milk (Spearman's correlation test). NAD: Nicotinamide adenine dinucleotide, NMN: Nicotinamide mononucleotide, and NAM: Nicotinamide.
