# Supplementary material for: Effect of Nicotinamide Mononucleotide Concentration in Human Milk on Neurodevelopmental Outcome: The Tohoku Medical Megabank Project Birth and Three-Generation Cohort Study
Source: MDPI journal article supplement (doi:10.3390/nu16010145), 2023-12-31
Supplement: s1 [file s1]

## Online Supplementary Material

**Effect of nicotinamide mononucleotide concentration in human milk on neurodevelopmental outcome: the Tohoku Medical Megabank Project Birth and Three-Generation Cohort Study.**

**Yoshie Saito et al.**

**Supplementary Table S3.** Quantiles of NAD-related substances in breast milk.

| Analyte | unit | N   | mean | SD  | Median | min | max  | 10% | 25% | 50% | 75%  | 90%  |
|---------|------|-----|------|-----|--------|-----|------|-----|-----|-----|------|------|
| NAD     | μM   | 150 | 2.5  | 1.2 | 2.2    | 0.2 | 7.0  | 1.3 | 1.6 | 2.2 | 3.0  | 4.0  |
| NMN     | μM   | 150 | 9.2  | 3.5 | 9.2    | 0.2 | 24.1 | 5.4 | 7.0 | 9.2 | 11.2 | 13.3 |
| NAM     | μM   | 150 | 3.5  | 2.3 | 2.7    | 1.3 | 14.1 | 1.8 | 2.1 | 2.7 | 4.2  | 6.3  |
| NR      | μM   | 150 | 1.1  | 1.2 | 0.8    | 0.0 | 6.0  | 0.0 | 0.2 | 0.8 | 1.7  | 2.6  |
| NA      | μM   | 150 | 0.0  | 0.1 | 0.0    | 0.0 | 0.9  | 0.0 | 0.0 | 0.0 | 0.0  | 0.0  |

NAD: Nicotinamide adenine dinucleotide, NMN: Nicotinamide mononucleotide, NAM: Nicotinamide, NR: Nicotinamide riboside, and NA: Nicotinic acid.
