# Supplementary material for: Effect of Nicotinamide Mononucleotide Concentration in Human Milk on Neurodevelopmental Outcome: The Tohoku Medical Megabank Project Birth and Three-Generation Cohort Study
Source: MDPI journal article supplement (doi:10.3390/nu16010145), 2023-12-31
Supplement: s1 [file s1]

## Online Supplementary Material

**Effect of nicotinamide mononucleotide concentration in human milk on neurodevelopmental outcome: the Tohoku Medical Megabank Project Birth and Three-Generation Cohort Study.**

**Yoshie Saito et al.**

**Supplementary Table S1.** Parameters for HPLC–MS/MS analysis of NAD-related compounds.

| Analyte |                                                                 | Molecular weight<br>of free form<br>(Da) | Parent ion<br>(m/z) | Daughter ion<br>(m/z) | Cone<br>(v) | Collision<br>(eV) |
|---------|-----------------------------------------------------------------|------------------------------------------|---------------------|-----------------------|-------------|-------------------|
| NAD     | Nicotinamide adenine dinucleotide                               | 663.4                                    | 664.2               | 428.1                 | 35          | 26                |
| NAD_IS  | Nicotinamide adenine dinucleotide- <sup>13</sup> C <sup>5</sup> | 668.4                                    | 669.1               | 428.0                 | 6           | 26                |
| NMN     | Nicotinamide mononucleotide                                     | 334.2                                    | 335.2               | 123.0                 | 18          | 12                |
| NMN_IS  | Nicotinamide-d4 mononucleotide                                  | 338.2                                    | 339.1               | 84.1                  | 20          | 49                |
| NAM     | Nicotinamide                                                    | 122.1                                    | 123.2               | 79.9                  | 46          | 14                |
| NAM_IS  | Nicotinamide- <sup>13</sup> C <sup>6</sup>                      | 128.1                                    | 129.0               | 85.4                  | 32          | 20                |
| NR      | Nicotinamide riboside                                           | 255.3                                    | 255.1               | 123.1                 | 10          | 10                |
| NA      | Nicotinic acid                                                  | 123.1                                    | 124.0               | 80.2                  | 16          | 18                |
| NA_IS   | Nicotinic acid- <sup>13</sup> C <sup>6</sup>                    | 129.1                                    | 130.1               | 83.0                  | 22          | 24                |
| MeNAM   | N-Methylnicotinamide                                            | 136.2                                    | 137.1               | 79.9                  | 34          | 20                |
| NAMN    | Nicotinic acid mononucleotide                                   | 335.2                                    | 336.2               | 124.0                 | 4           | 12                |
| NAAD    | Nicotinic Acid Adenine Dinucleotide                             | 665.4                                    | 665.2               | 428.2                 | 46          | 28                |
| NADP    | Nicotinamide adenine dinucleotide phosphate                     | 743.4                                    | 744.0               | 604.0                 | 54          | 18                |
