# Supplementary material for: Effect of Nicotinamide Mononucleotide Concentration in Human Milk on Neurodevelopmental Outcome: The Tohoku Medical Megabank Project Birth and Three-Generation Cohort Study
Source: MDPI journal article supplement (doi:10.3390/nu16010145), 2023-12-31
Supplement: s1 [file s1]

## Online Supplementary Material

**Effect of nicotinamide mononucleotide concentration in human milk on neurodevelopmental outcome: the Tohoku Medical Megabank Project Birth and Three-Generation Cohort Study.**

**Yoshie Saito et al.**

**Supplementary Table S4.** Association between NAD-related substances in breast milk and developmental indicators determined via ordinal logistic regression. Analysis of mother–infant pairs excluding infants with a gestational age of less than 37 weeks.

| 24-month ASQ-3  | Crude             |         |   | Adjusted          |         |   |
|-----------------|-------------------|---------|---|-------------------|---------|---|
|                 | cOR (95% CI)      | Q value |   | cOR (95% CI)      | Q value |   |
| NMN             |                   |         |   |                   |         |   |
| Communication   | 1.12 (1.02, 1.24) | 0.021   | * | 1.15 (1.03, 1.28) | 0.014   | * |
| Gross motor     | 1.12 (1.01, 1.23) | 0.024   | * | 1.15 (1.03, 1.29) | 0.014   | * |
| Fine motor      | 1.12 (1.03, 1.23) | 0.014   | * | 1.14 (1.04, 1.25) | 0.011   | * |
| Problem solving | 1.21 (1.09, 1.33) | 0.001   | * | 1.19 (1.08, 1.32) | 0.002   | * |
| Personal-social | 1.14 (1.04, 1.25) | 0.014   | * | 1.20 (1.08, 1.33) | 0.002   | * |

Crude model: ( $N = 148$ )

Adjusted model: adjusted for gestational week, household income, alcohol consumption during pregnancy, and number of children ( $N = 142$ ).

\*  $Q < 0.05$ ; NMN: Nicotinamide mononucleotide; ASQ: Ages and Stages Questionnaire.
