# Supplementary material for: Effect of Nicotinamide Mononucleotide Concentration in Human Milk on Neurodevelopmental Outcome: The Tohoku Medical Megabank Project Birth and Three-Generation Cohort Study
Source: MDPI journal article supplement (doi:10.3390/nu16010145), 2023-12-31
Supplement: s1 [file s1]

## Online Supplementary Material

**Effect of nicotinamide mononucleotide concentration in human milk on neurodevelopmental outcome: the Tohoku Medical Megabank Project Birth and Three-Generation Cohort Study.**

**Yoshie Saito et al.**

**Supplementary Table S2.** Matrix-matched calibration range, recovery, ion suppression, and precision of NAD-related compounds.

| Analyte | Fitted calibration | Applied weighting | Selected internal standard | Calibrated range in human milk ( $\mu\text{M}$ ) | Recovery (%) | Ion suppression (%) | Inter-day precision (%) |
|---------|--------------------|-------------------|----------------------------|--------------------------------------------------|--------------|---------------------|-------------------------|
| NAD     | Linear             | 1/x               | NAD_IS                     | 1.5–150.7                                        | 105.0%       | –6.0%               | 6.4%                    |
| NMN     | Linear             | 1/x               | NMN_IS                     | 0.6–59.8                                         | 91.6%        | 56.4%               | 1.4%                    |
| NAM     | Linear             | 1/x               | NAM_IS                     | 0.3–163.8                                        | 89.7%        | 2.0%                | 1.0%                    |
| NR      | Linear             | 1/x               | NAM_IS                     | 0.2–78.4                                         | 101.8%       | –0.4%               | 12.2%                   |
| NA      | Linear             | 1/x               | NA_IS                      | 0.3–162.5                                        | 100.5%       | –8.0%               | 8.0%                    |
| MeNAM   | Linear             | 1/x               | NAM_IS                     | 0.3–146.9                                        | 101.6%       | –12.2%              | -                       |
| NAAD    | Linear             | 1/x               | NAD_IS                     | 0.3–30.1                                         | 107.7%       | –17.1%              | -                       |
| NADP    | Linear             | 1/x               | NAD_IS                     | 2.7–26.9                                         | 77.7%        | 10.1%               | -                       |

NAD: Nicotinamide adenine dinucleotide, NMN: Nicotinamide mononucleotide, NAM: nicotinamide, NR: Nicotinamide riboside, NA: Nicotinic acid, MeNAM: Methylnicotinamide, NAAD: Nicotinic acid adenine dinucleotide, and NADP: Nicotinamide adenine dinucleotide phosphate.
