# Supplementary material for: Effect of Nicotinamide Mononucleotide Concentration in Human Milk on Neurodevelopmental Outcome: The Tohoku Medical Megabank Project Birth and Three-Generation Cohort Study
Source: MDPI journal article supplement (doi:10.3390/nu16010145), 2023-12-31
Supplement: s1 [file s1]

## Online Supplementary Material

**Effect of nicotinamide mononucleotide concentration in human milk on neurodevelopmental outcome: the Tohoku Medical Megabank Project Birth and Three-Generation Cohort Study.**

**Yoshie Saito et al.**

**Supplementary Table S5.** Association between NAD-related substances in breast milk and developmental indicators determined using ordinal logistic regression. Analysis of mother–infant pairs excluding infants with low birth weight (< 2,500 g).

| 24-month ASQ-3  | Crude             |         |   | Adjusted          |         |   |
|-----------------|-------------------|---------|---|-------------------|---------|---|
|                 | cOR (95% CI)      | Q value |   | cOR (95% CI)      | Q value |   |
| NMN             |                   |         |   |                   |         |   |
| Communication   | 1.13 (1.02, 1.25) | 0.024   | * | 1.15 (1.03, 1.29) | 0.017   | * |
| Gross motor     | 1.11 (1.01, 1.23) | 0.038   | * | 1.16 (1.03, 1.30) | 0.017   | * |
| Fine motor      | 1.10 (1.01, 1.20) | 0.036   | * | 1.12 (1.02, 1.23) | 0.020   | * |
| Problem solving | 1.21 (1.09, 1.33) | 0.001   | * | 1.19 (1.07, 1.32) | 0.003   | * |
| Personal-social | 1.14 (1.04, 1.26) | 0.014   | * | 1.21 (1.09, 1.35) | 0.002   | * |

Crude model: (*N* = 134)

Adjusted model: adjusted for gestational week, household income, alcohol consumption during pregnancy, and number of children (*N* = 129).

\* *Q* < 0.05; NMN: Nicotinamide mononucleotide; ASQ: Ages and Stages Questionnaire.
