# Supplementary material for: Effect of Nicotinamide Mononucleotide Concentration in Human Milk on Neurodevelopmental Outcome: The Tohoku Medical Megabank Project Birth and Three-Generation Cohort Study
Source: Nutrients. 2023 Dec 31;16(1):145. doi: 10.3390/nu16010145 (PMC10780616; doi:10.3390/nu16010145)
Supplement: Supplementary file 1 [file nutrients-16-00145-s001.zip]

Archive with 7 entries (7 files):
- FigureS1.pdf
- FigureS2.pdf
- TableS1.pdf
- TableS2.pdf
- TableS3.pdf
- TableS4.pdf
- TableS5.pdf
